# Supplementary material for: Receptor for Activated C Kinase 1 promotes cervical cancer lymph node metastasis via glycolysis-dependent AKT/mTOR signaling pathway
Source: Research Square preprint supplement (doi:10.21203/rs.3.rs-1249002/v1), 2022-01-17
Supplement: Supplementary file 1 [file 8445d02a0a99b78502ca41ad.docx]

Table S4. Differential metabolites of shRACK1/MS751 and shNON/MS751 and their variations

| Differential metabolite | Chemical shif(10-6) | Variations |
| --- | --- | --- |
| 3-hydroxybutyrate | 1.20d | ↑ |
| β-glucose | 5.23d | ­↓ |
| cysteine | 3.04m | ­ |
| alanine | 1.46d |  |
| acetate | 1.91s | ­ |
| choline | 3.21s | ­ |
| dimethylamine | 2.72s | ­ |
| glycine | 3.57s | ­ |
| glutamate | 2.36m | ­ |
| guanidoacetate | 3.80s | ­ |
| lysine | 1.73m | ­ |
| tyrosine | 7.20d | ­ |
| leucine | 0.95d | ­ |
| taurine | 3.25t | ­ |
| proline | 3.45m | ­ |
| lactate | 1.32d |  |
| trimethylamine | 2.88s |  |
| valine | 0.97d |  |
| isoleucine | 0.93t | ­ |

Notes: s—singlet; d—doublet; t—triplet; q—quartet; m—multiple; dd—doublet of doublets; ddd—doublet of doublets doublet. “↑”represents higher levels of metabolites in shRACK1/MS751 cells than shNON/MS751 cells. ”↓" represents lower levels of metabolites in shRACK1/MS751 cells than shNON/MS751 cells.
